# Supplementary material for: The OH−-driven synthesis of Pt–Ni nanocatalysts with atomic segregation for alkaline hydrogen evolution reaction
Source: Royal Society of Chemistry journal article supplement (doi:10.1039/c8ta12250d), 2019-01-01
Supplement: c8ta12250d1.pdf [file c8ta12250d1.pdf]

## **The OH<sup>-</sup>-Driven Synthesis of Pt-Ni Nanocatalysts with Atomic Segregation for Alkaline Hydrogen Evolution Reaction**

Cong Zhang,<sup>a</sup> Biaohua Chen,<sup>b</sup> Xin Liang<sup>ac\*</sup>

a. State Key Laboratory of Chemical Resource Engineering, Beijing University of Chemical Technology, Beijing, 100029 China.

b. Beijing University of Technology, Beijing, 100124 China.

c. Beijing Advanced Innovation Centre for Soft Matter Science and Engineering, Beijing, 100029 China.

\*Corresponding author. Email: [liangxin@mail.buct.edu.cn](mailto:liangxin@mail.buct.edu.cn)

## **Supporting Information**

## Section S1

### Nernst Equation:

#### 1. Pt-Ni Alloy

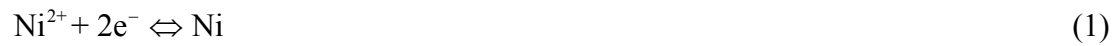

$$E = E^{\theta} - \frac{RT}{nF} \ln \frac{[\text{Ni}]}{[\text{Ni}^{2+}]} \quad (2)$$

$$E^{\theta}(\text{Ni}^{2+}/\text{Ni}) = -0.257 \text{ V}$$

$$E_{\text{Ni}} = -0.263 \text{ V}$$

#### 2. Pt-Ni Hetero

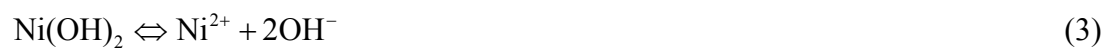

$$K_{\text{sp}} = [\text{Ni}^{2+}] \cdot [\text{OH}^{-}]^2 = 5.47 \times 10^{-16}$$

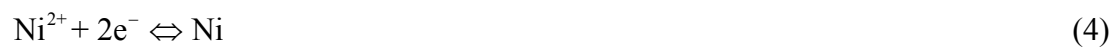

$$E = E^{\theta} - \frac{RT}{nF} \ln \frac{[\text{Ni}]}{[\text{Ni}^{2+}]} \quad (5)$$

$$E^{\theta}(\text{Ni}^{2+}/\text{Ni}) = -0.257 \text{ V}$$

$$E_{\text{Ni}} = -0.587 \text{ V}$$

Section S2

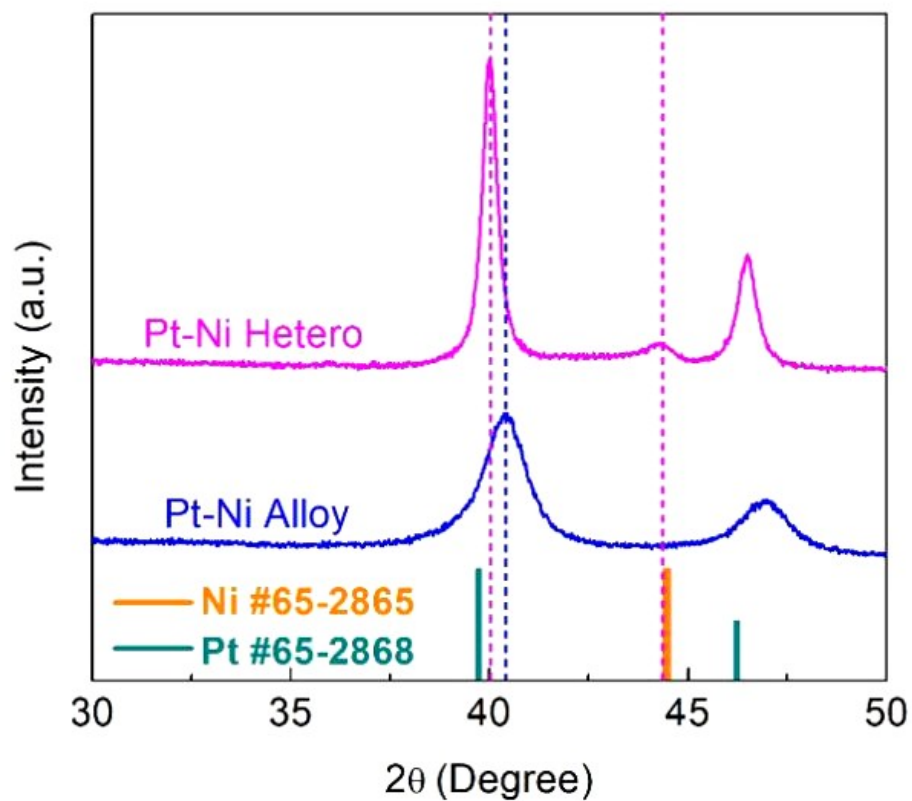

**Figure S1** Magnification of the XRD patterns of Pt-Ni alloy and Pt-Ni hetero catalysts.

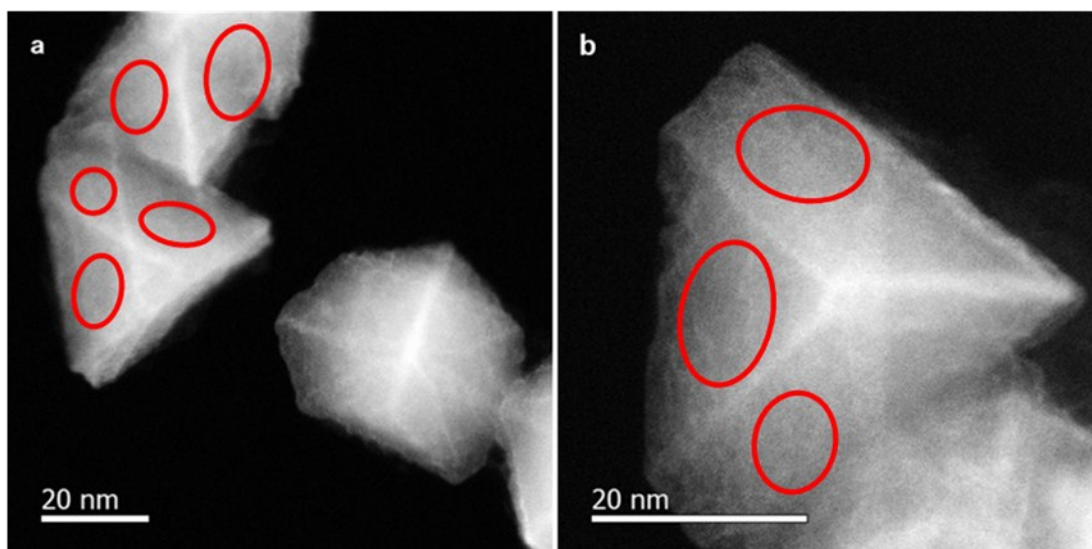

**Figure S2** Aberration-Corrected-HAADF-STEM images of the Pt-Ni heterostructure.

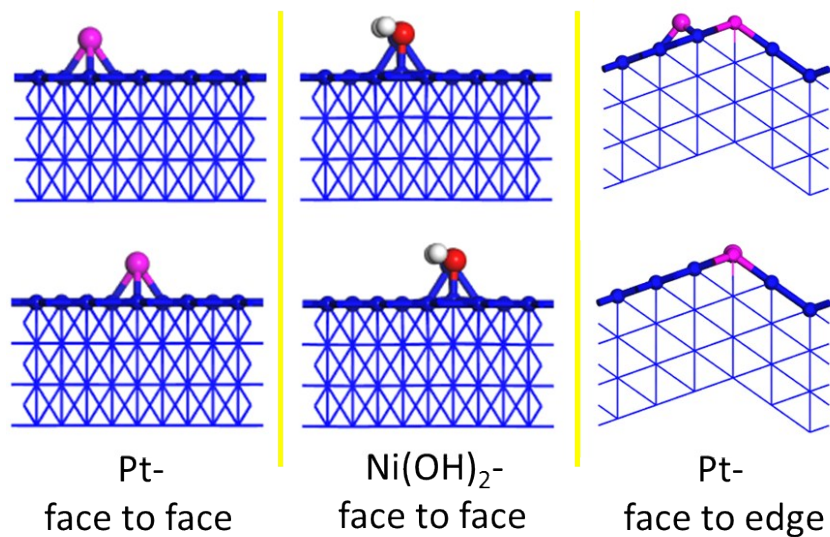

**Figure S3** The side view images of the models.

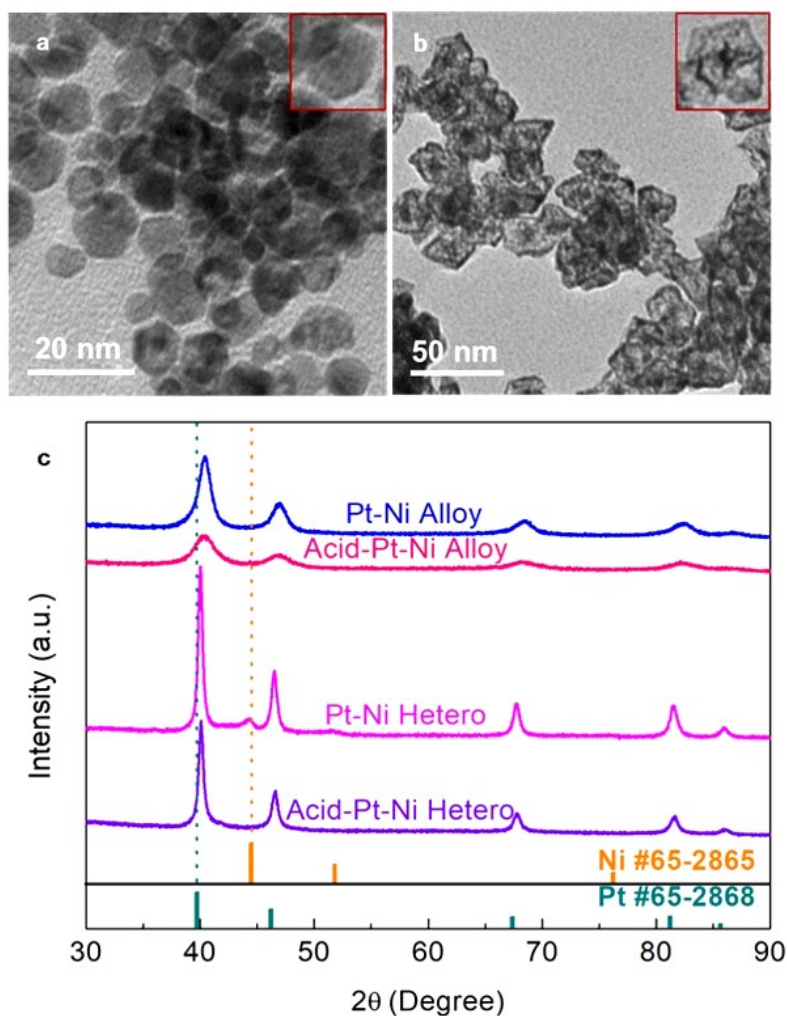

**Figure S4** TEM patterns of (a) acid-Pt-Ni alloy and (b) acid-Pt-Ni hetero. (c) XRD patterns of Pt-Ni alloy, Pt-Ni hetero, acid-Pt-Ni alloy and acid-Pt-Ni hetero catalysts, respectively.

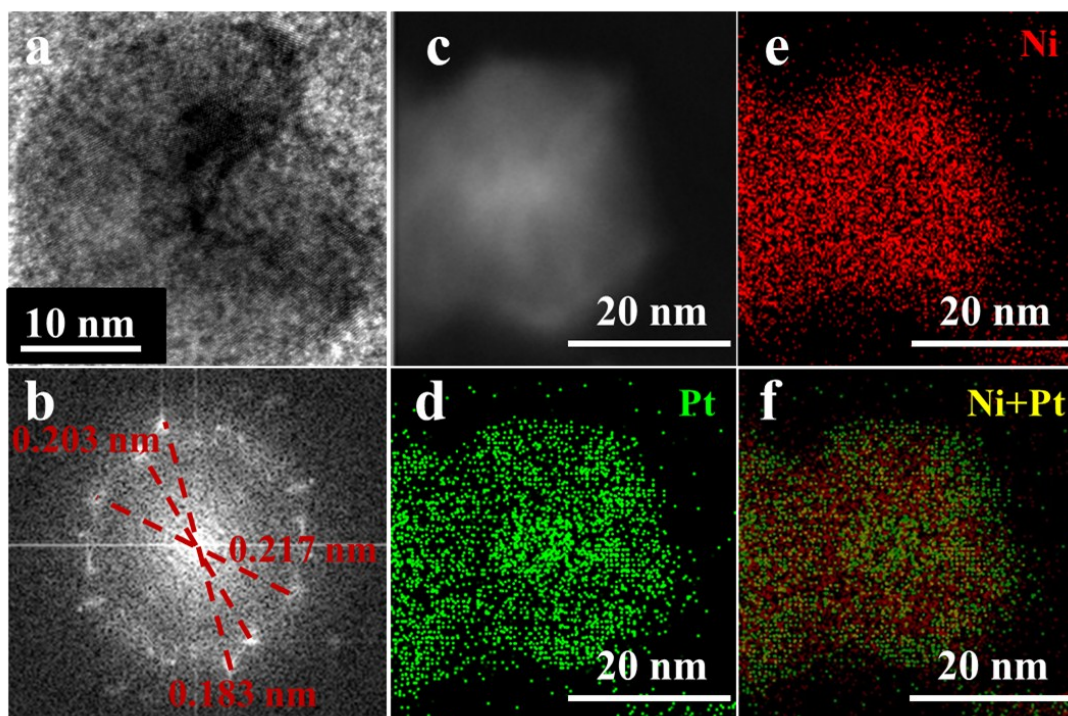

**Figure S5.** The structure of Ni segregated Pt-Ni after HER. (a) HRTEM image, (b) the corresponding FFT image, (c) HADDF-STEM image of the single crystal, (d) EDS-mapping of Pt species, (e) EDS-mapping of Ni species and (f) EDS-mapping of Ni and Pt species. The lattice fringes of Pt-Ni hetero are 0.183 nm, 0.217 nm and 0.203 nm, which are respectively consistent with the {200} and {111} plane of Pt-Ni, and {111} plane of Ni.

**Table S1.** Thermodynamic data used in the free energy of formation calculations.

|                  | ZPE (eV) | TS (eV) |
|------------------|----------|---------|
| H <sub>2</sub> O | 0.56     | 0.67    |
| H <sub>2</sub>   | 0.27     | 0.41    |
| Pt               | 0        | 0       |
| Ni               | 0        | 0       |
| Alloy            | 0        | 0       |
| H*               | 0.17     | 0.08    |
| OH*              | 0.30     | 0.08    |
| (HO-H)*          | 0.55     | 0.21    |

**Table S2.** Summary of the atomic ratios for Pt-Ni alloy and Pt-Ni hetero from XPS results.

| Sample       | Pt/Ni     | Pt <sup>2+</sup> /Pt | Ni <sup>2+</sup> /Ni |
|--------------|-----------|----------------------|----------------------|
| Pt-Ni alloy  | 0.58/0.42 | 0.77/0.23            | 0.56/0.44            |
| Pt-Ni hetero | 0.41/0.59 | 0.77/0.23            | 0.81/0.19            |

**Table S3.** The alkaline HER activities of this work and some representative Pt-based materials recently reported.

| Catalyst                                  | Electrolyte | $\eta$<br>(mV vs. RHE)        | ECSA<br>(m <sup>2</sup> /g Pt) | Ref.                                            |
|-------------------------------------------|-------------|-------------------------------|--------------------------------|-------------------------------------------------|
| PtNi frames/Ni(OH) <sub>2</sub>           | 0.1M KOH    | ~90 (10 mA cm <sup>-2</sup> ) | None                           | Science, 2014 <sup>1</sup>                      |
| Pt NWs/SL-Ni(OH) <sub>2</sub>             | 0.1M KOH    | 57.8 (4 mA cm <sup>-2</sup> ) | 22.8                           | Nat. Commun., 2015 <sup>2</sup>                 |
| Pt/C/20wt% SL Ni(OH) <sub>2</sub>         | 0.1M LiOH   | 121 (5 mA cm <sup>-2</sup> )  | None                           | ACS catal., 2015 <sup>3</sup>                   |
| Co(OH) <sub>2</sub> @PdNi HNSs/NF         | 1M NaOH     | 90 (10 mA cm <sup>-2</sup> )  | None                           | Adv. Mater., 2015 <sup>4</sup>                  |
| Pt-Ni/C                                   | 0.1M KOH    | ~70 (10 mA cm <sup>-2</sup> ) | 23                             | J. Mater. Chem. A, 2016 <sup>5</sup>            |
| PtCuNi/CNF@CF                             | 1M KOH      | 150 (5 mA cm <sup>-2</sup> )  | 35.8                           | ACS Appl. Mater. Interfaces, 2016 <sup>6</sup>  |
| PtNi Nanohexapod                          | 0.1 M KOH   | 29 (5 mA cm <sup>-2</sup> )   | 23                             | Nanoscale, 2016 <sup>7</sup>                    |
| Pt <sub>3</sub> Ni <sub>3</sub> NWs/C-air | 0.1M KOH    | ~70 (5mA cm <sup>-2</sup> )   | None                           | Angew. Chem. Int. Ed., 2016 <sup>8</sup>        |
| Ni <sub>3</sub> N/Pt                      | 1 M KOH     | 50 (10 mA cm <sup>-2</sup> )  | None                           | Adv. Energy Mater., 2017 <sup>9</sup>           |
| Hcp-excavated Pt-Ni nanomultipods         | 0.1M KOH    | 65 (10 mA cm <sup>-2</sup> )  | None                           | Nat. Commun., 2017 <sup>10</sup>                |
| Er-WS <sub>2</sub> -Pt                    | 1 M KOH     | ~50 (10 mA cm <sup>-2</sup> ) | None                           | Adv. Mater., 2017 <sup>11</sup>                 |
| 3D PdNN                                   | 1 M KOH     | 110 (10 mA cm <sup>-2</sup> ) | 85.6                           | ACS Appl. Mater. Interfaces, 2017 <sup>12</sup> |
| NiEt-OAm <sub>6</sub>                     | 1M NaOH     | 180 (10 mA cm <sup>-2</sup> ) | None                           | Electrochim. Acta, 2017 <sup>13</sup>           |
| PtNi/CNFs                                 | 1 M KOH     | 82 (10 mA cm <sup>-2</sup> )  | None                           | J. Mater. Sci., 2017 <sup>14</sup>              |
| PtCoNi FNs                                | 0.5 M KOH   | 54 (10 mA cm <sup>-2</sup> )  | ~28                            | Int. J. Hydrogen Energy, 2017 <sup>15</sup>     |
| PtNi NCs                                  | 0.5 M KOH   | 160 (10 mA cm <sup>-2</sup> ) | ~32                            | Int. J. Hydrogen Energy, 2017 <sup>15</sup>     |
| Pt-Co(OH) <sub>2</sub> /CC                | 1 M KOH     | 32 (10 mA cm <sup>-2</sup> )  | None                           | ACS catal., 2017 <sup>16</sup>                  |
| Pd-Pt-S                                   | 1 M         | 71 (10 mA cm <sup>-2</sup> )  | None                           | ACS Appl.                                       |

|                                       |            |                               |      |                                             |
|---------------------------------------|------------|-------------------------------|------|---------------------------------------------|
|                                       | KOH        |                               |      | Mater. Interfaces, 2017 <sup>17</sup>       |
| Pt/Fe-NF                              | 0.05 M KOH | ~65 (10 mA cm <sup>-2</sup> ) | None | Int. J. Hydrogen Energy, 2017 <sup>18</sup> |
| Au <sub>33</sub> Pt <sub>67</sub> NPs | 0.1 M KOH  | 88 (10 mA cm <sup>-2</sup> )  | None | Electrochim. Acta, 2018 <sup>19</sup>       |
| 20 % Pt-C                             | 0.1 M KOH  | 61 (10mA cm <sup>-2</sup> )   | 12.9 | This work                                   |
| Pt-Ni alloy                           | 0.1 M KOH  | 82 (10mA cm <sup>-2</sup> )   | 10.5 | This work                                   |
| Pt-Ni hetero                          | 0.1M KOH   | 48 (10mA cm <sup>-2</sup> )   | 3.9  | This work                                   |

## References

1. C. Chen, Y. Kang, Z. Huo, Z. Zhu, W. Huang, H. L. Xin, J. D. Snyder, D. Li, J. A. Herron, M. Mavrikakis, M. Chi, K. L. More, Y. Li, N. M. Markovic, G. A. Somorjai, P. Yang and V. R. Stamenkovic, *Science*, 2014, **343**, 1339-1343.
2. H. Yin, S. Zhao, K. Zhao, A. Muqsit, H. Tang, L. Chang, H. Zhao, Y. Gao and Z. Tang, *Nat. Commun.*, 2015, **6**, 6430.
3. L. Wang, C. Lin, D. Huang, J. Chen, L. Jiang, M. Wang, L. Chi, L. Shi and J. Jin, *ACS Catal.*, 2015, **5**, 3801-3806.
4. J. X. Feng, L. X. Ding, S. H. Ye, X. J. He, H. Xu, Y. X. Tong and G. R. Li, *Adv. Mater.*, 2015, **27**, 7051-7057.
5. R. Kaviani, S.-I. Choi, J. Park, T. Liu, H.-C. Peng, N. Lu, J. Wang, M. J. Kim, Y. Xia and S. W. Lee, *J. Mater. Chem. A*, 2016, **4**, 12392-12397.
6. Y. Shen, A. C. Lua, J. Xi and X. Qiu, *ACS Appl. Mater. Interfaces*, 2016, **8**, 3464-3472.
7. A. Oh, Y. J. Sa, H. Hwang, H. Baik, J. Kim, B. Kim, S. H. Joo and K. Lee, *Nanoscale*, 2016, **8**, 16379-16386.
8. P. Wang, K. Jiang, G. Wang, J. Yao and X. Huang, *Angew. Chem. Int. Ed.*, 2016, **55**, 12859-12863.
9. Y. Wang, L. Chen, X. Yu, Y. Wang and G. Zheng, *Adv. Energy Mater.*, 2017, **7**, 672-677.
10. Z. Cao, Q. Chen, J. Zhang, H. Li, Y. Jiang, S. Shen, G. Fu, B. A. Lu, Z. Xie and L. Zheng, *Nat. Commun.*, 2017, **8**, 15131.
11. K. Tang, X. Wang, Q. Li and C. Yan, *Adv. Mater.*, 2018, **30**, 1870047.
12. H. Begum, M. S. Ahmed and S. Jeon, *ACS Appl. Mater. Interfaces*, 2017, **9**, 39303-39311.
13. S. A. Abbas, M. I. Iqbal, S. H. Kim and K. D. Jung, *Electrochim. Acta*, 2017, **227**, 382-390.
14. J. Chen, J. Wang, J. Chen and L. Wang, *J. Mater. Sci.*, 2017, **52**, 13064-13077.
15. M. T. Liu, L. X. Chen, A. J. Wang, K. M. Fang and J. J. Feng, *Int. J. Hydrogen Energy*, 2017, **42**, 25277-25284.
16. Z. Xing, C. Han, D. Wang, Q. Li and X. Yang, *ACS Catal*, 2017, **7**, 7131-7135.
17. J. Fan, K. Qi, L. Zhang, H. Zhang, S. Yu and X. Cui, *ACS Appl. Mater. Interfaces*, 2017, **9**, 18008-18014.

18. S. Lu and Z. Zhuang, *J Am Chem Soc*, 2017, **139**, 5156-5163.
19. W. Wu, Z. Tang, K. Wang, Z. Liu, L. Li and S. Chen, *Electrochim. Acta*, 2018, **260**, 168-176.
